# Supplementary material
Source: PubMed Central journal article supplement (PMC3428077)
Supplement: JCI60498sd.pdf [file JCI60498sd.pdf]

**Supplemental Table 1.** Candidate genes discovered from the functional screen

| Gene Name                                              | Accession No. | Remarks                                                                        | Locus    | Resistance      |
|--------------------------------------------------------|---------------|--------------------------------------------------------------------------------|----------|-----------------|
| Hypothetical protein<br>LOC84985                       | NM207006      | Hypothetical, contains phospholipase D active domain                           | 8q24.13  | AG1478 (EGFR)   |
| MRG(MORF4-related gene)-binding protein (MRGBP)        | NM018270      | Chromatin modification, regulation of transcription, regulation of cell growth | 20q13.33 | LY294002 (PI3K) |
| Zinc-finger protein like 1 (ZFPL1)                     | NM006782      | Zinc ion binding, integral to membrane, biological process is unknown          | 11q13    | Ly294002 (PI3K) |
| Polypyrimidine tract binding protein variant 1 (PTBP1) | NM002819      | hnRNPs:RNA binding protein, pre-mRNA processing, mRNA metabolism and transport | 19p13.3  | Ly294002 (PI3K) |
| Rab32                                                  | NM006834      | Ras family, Rab GTPase, a kinase anchoring protein, mitochondria dynamics      | 6q24.3   | AG1478 (EGFR)   |

**Supplemental Table 2.** Cell lines used for the analysis in **Supplemental Fig. 7 (1)**.

| Cell.line | GEO.ID   | Histology      | Set    | EGFR      | KRAS      | IC50.umol.L | FAM83A.expression |
|-----------|----------|----------------|--------|-----------|-----------|-------------|-------------------|
| H3255     | GSM99018 | Adenocarcinoma | Mutant | Mutant    | NA        | 0.015       | 9.23325385        |
| A549      | GSM99019 | Adenocarcinoma | Train  | Wild-type | Wild-type | 9.6         | 8.562611441       |
| Calu3     | GSM99020 | Adenocarcinoma | Train  | Wild-type | NA        | 0.3         | 7.438812196       |
| H125      | GSM99021 | Adenosquamous  | Train  | Wild-type | Wild-type | 4.8         | 9.179826983       |
| H1334     | GSM99022 | Large          | Train  | Wild-type | Wild-type | 0.3         | 8.073124457       |
| H157      | GSM99023 | Squamous       | Train  | Wild-type | Mutant    | 12.8        | 8.683971565       |
| H157      | GSM99023 | Squamous       | Test   | Wild-type | Mutant    | 13.8        | 8.683971565       |
| H1648     | GSM99024 | Adenocarcinoma | Train  | Wild-type | Wild-type | 0.38        | 9.606765642       |
| H1650     | GSM99025 | Adenocarcinoma | Mutant | Mutant    | Wild-type | 1           | 9.462717022       |
| H1703     | GSM99026 | Squamous       | Train  | Wild-type | Wild-type | 8           | 7.57965065        |
| H1975     | GSM99027 | Adenocarcinoma | Mutant | Mutant    | Wild-type | 8           | 9.735347065       |
| H358      | GSM99030 | BAC            | Train  | Wild-type | Mutant    | 0.18        | 9.156481553       |
| H460      | GSM99031 | Large          | Train  | Wild-type | Mutant    | 12.9        | 8.504351252       |
| H460      | GSM99031 | Large          | Test   | Wild-type | Mutant    | 8           | 8.504351252       |
| H520      | GSM99032 | Squamous       | Train  | Wild-type | NA        | 13.6        | 7.552893222       |
| H820      | GSM99033 | Adenocarcinoma | Mutant | Mutant    | Wild-type | 3           | 8.836597887       |
| HCC4006   | GSM99034 | Adenocarcinoma | Mutant | Mutant    | Wild-type | 0.02        | 8.178024513       |
| HCC827    | GSM99035 | Adenocarcinoma | Test   | Mutant    | Wild-type | 0.005       | 8.33929926        |

## Supplemental Figures

### Supplemental Figure 1

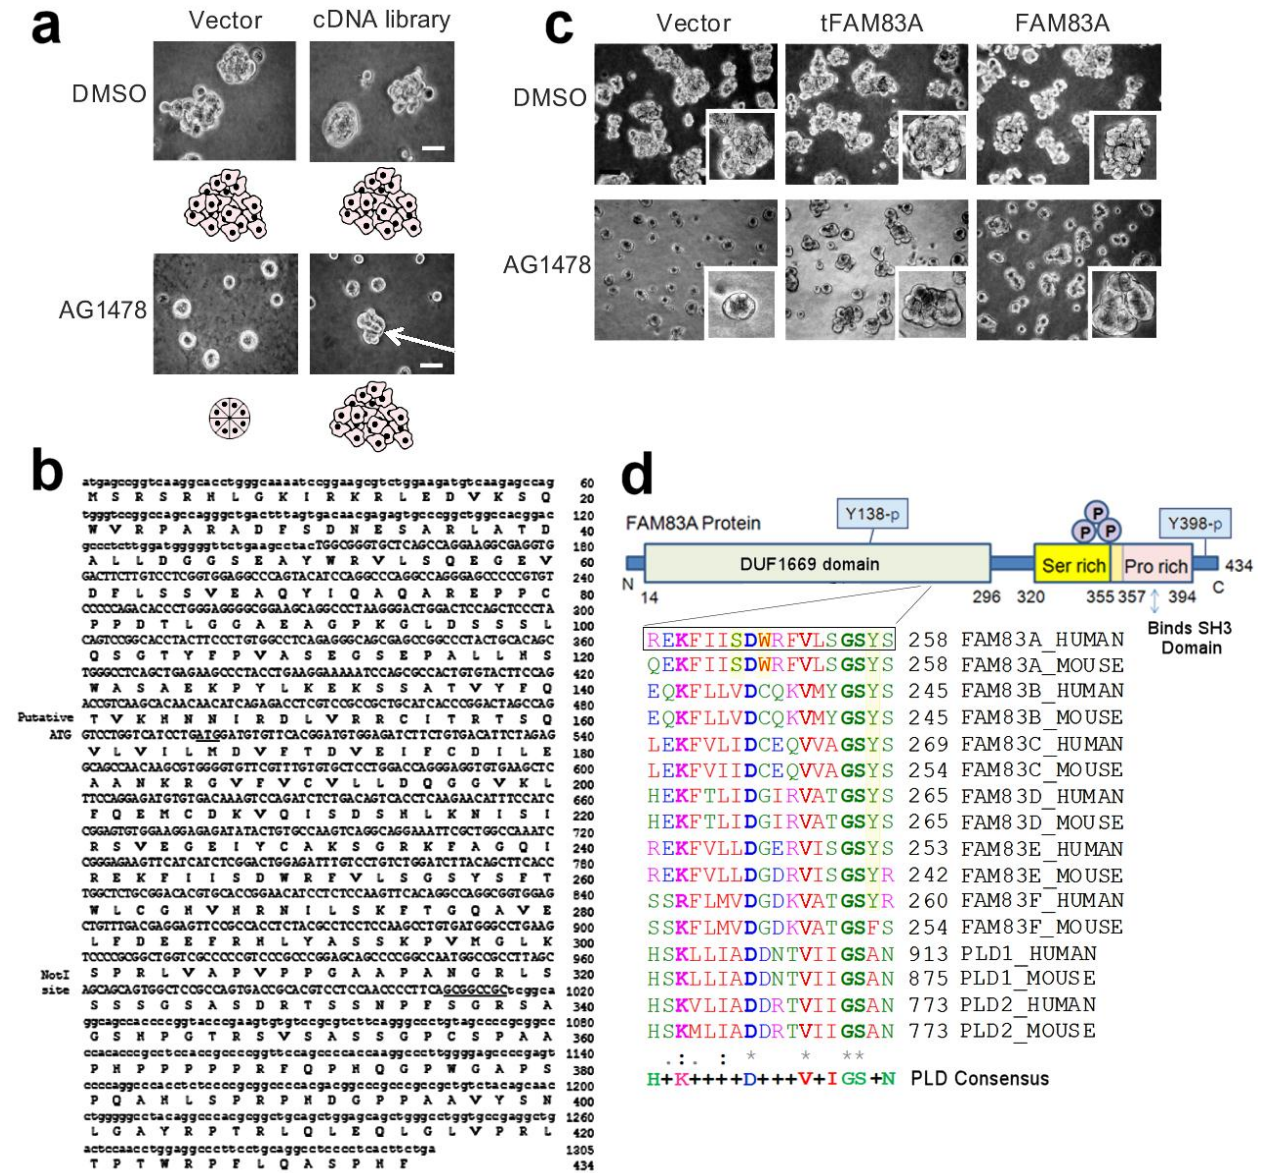

**Supplemental Figure 1. Overexpression of the truncated or full length FAM83A renders T4-2 cells resistant to AG1478-induced phenotypic reversion in 3D cultures.**

(a) cDNA library-transduced T4-2 cells were treated with 100nM AG1478 in 3D IrECM for 4 days. Colonies that displayed resistance to reversion (black arrow) were isolated (scale bar: 50µm). (b) Full-length DNA and amino acid sequences of FAM83A. Capitalized DNA sequence represents those obtained in the initial clone. (c) Full-length or truncated FAM83A-overexpressing T4-2 cells in the absence (top) or presence (bottom) of the EGFR inhibitor, AG1478 (scale bar: 50µm). (d) Schematic for the protein domain structure of FAM83A. The regions containing the PLD consensus-like motif are aligned among different FAM83 family members in relation to PLD1 and PLD2.

Supplemental Figure 2

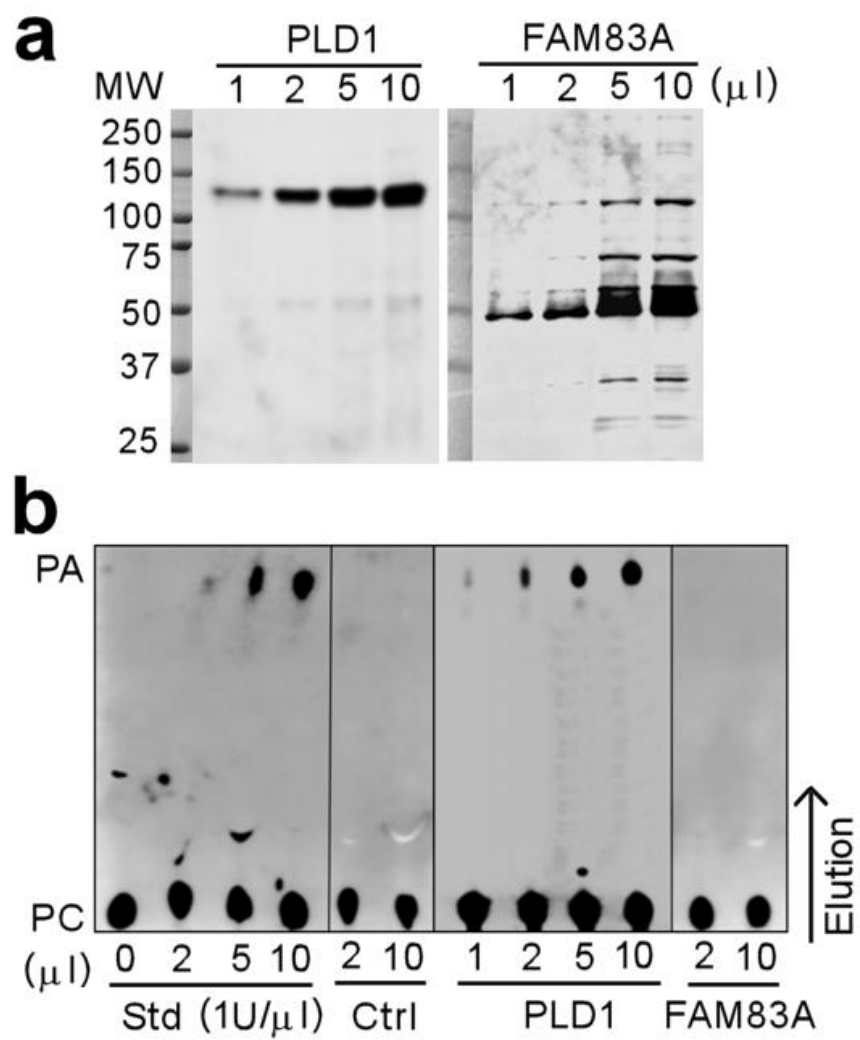

**Supplemental Figure 2. FAM83A protein prepared by *in vitro* transcription/translation does not exhibit detectable phospholipase D activity measured by thin layer chromatography.**

(a) Human phospholipase D1 (PLD1, MW= 124 kDa, left) and FAM83A (MW= 49 kDa, right) proteins prepared by *in vitro* transcription/translation of PLD1- and FAM83A-expressing plasmids were analyzed by western blot. (b) Phospholipase D protein standard (Std) and *in vitro* transcription/translation products prepared from empty vector (Ctrl), PLD1-expressing plasmid (PLD1), and FAM83A-expressing plasmid (FAM83A) were incubated with phosphatidylcholine substrate (PC) for 90 min at 30 °C. The reaction product was separated by thin layer chromatography, and phospholipase D activity was detected by the presence of the faster migrating phosphatidic acid (PA) as the cleavage product.

Supplemental Figure 3

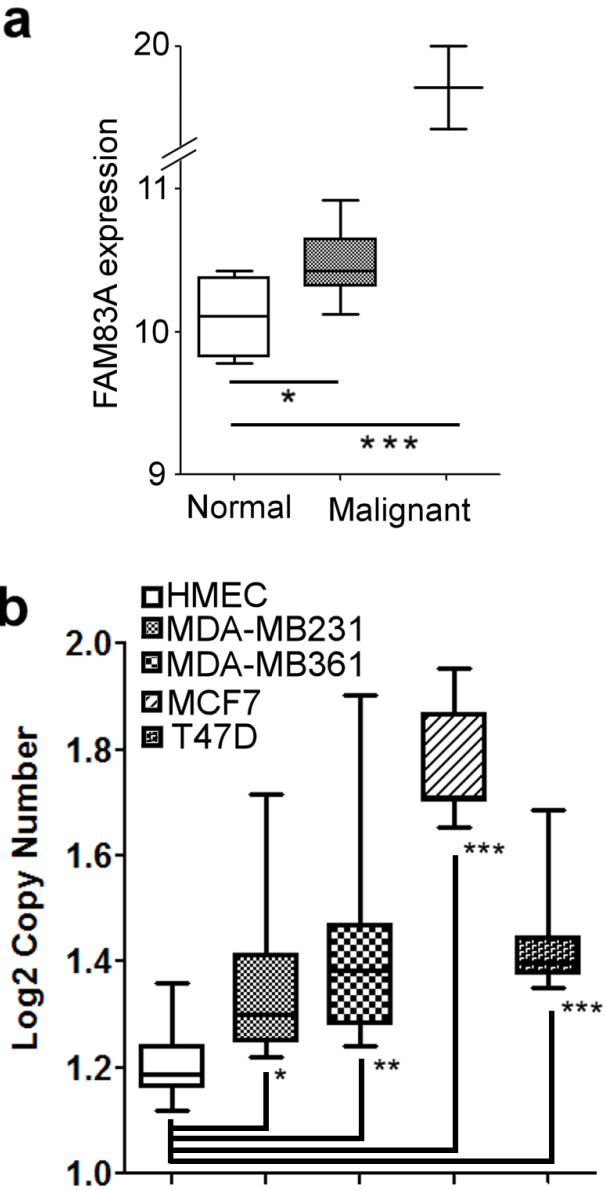

**Supplemental Figure 3. FAM83A gene expression is upregulated and the gene locus is amplified in breast cancer.**

(a) FAM83A gene expression in normal (n=4, first column) vs. cancerous (infiltrating ductal carcinoma; n=8, middle and n=2, right column [very high FAM83A expressers]) breast tissue samples. The analysis was performed on the dataset obtained from Howthorn et al. (GSE22840)

(2). (Student's t-test: \*p < 0.05, \*\*p < 0.01, \*\*\*p < 0.001.

(b) FAM83A gene copy number in non-malignant (HMEC) vs. cancerous (Mda-MB231, MDA-MB361, MCF7, and T47D) breast cell lines. The analysis was performed on the datasets

obtained from Beroukhi et al. (GSE19399) (3). (n= 13, Student's t-test: \*p < 0.05, \*\*p < 0.01, \*\*\*p < 0.001.)

Supplemental Figure 4

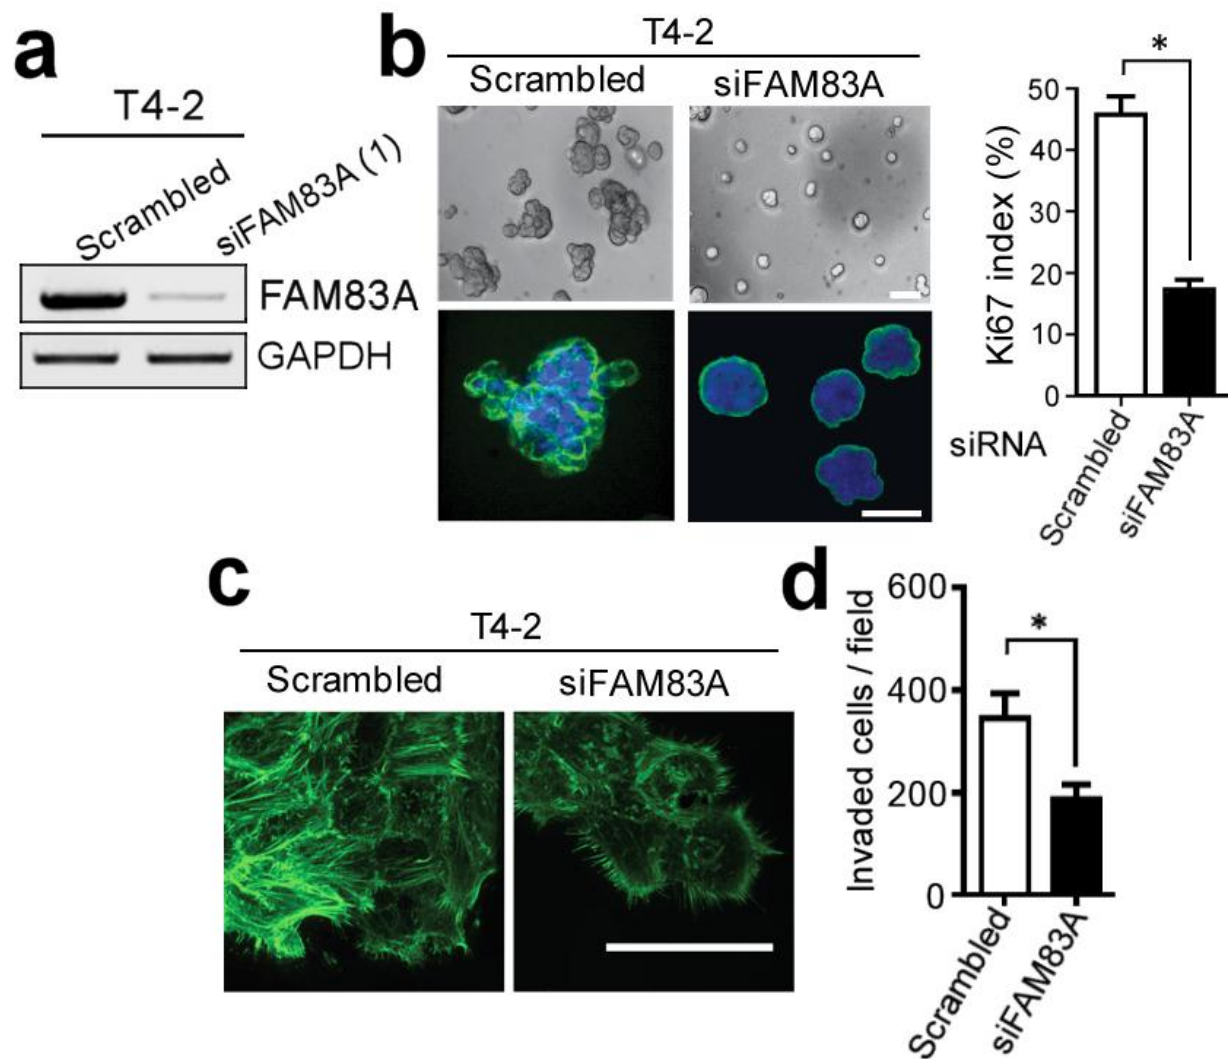

**Supplemental Figure 4. Reduction of FAM83A with specific siRNA impairs proliferative and invasive potentials of breast cancer cells.**

(a) FAM83A siRNA treatment to deplete FAM83A expression in T4-2 cells. Two siRNAs were used and siRNA (1) gave more complete inhibition. (b) (Left) FAM83A siRNA treatment reverted T4-2 cells to a polarized phenotype in 3D lrECM cultures. Top: Images were captured with phase I. Bottom:  $\alpha$ 6-integrin staining (green) was used to indicate basal polarity (blue: DAPI; scale bars: 50 $\mu$ m). (Right) Ki67 staining of control (scrambled siRNA) and FAM83A siRNA-treated cells to measure cell proliferation status (Student's t-test: \* $p < 0.05$ ). (c) T4-2 cells transfected with scrambled or FAM83A siRNA were stained for F-actin with phalloidin (scale bar: 50  $\mu$ m). (d) T4-2 cells were treated with FAM83A siRNA vs. control (scrambled), and invaded cells through lrECM-coated transwell filters were counted after 48 hours (n=3; Student's t-test: \* $p < 0.05$ ).

Supplemental Figure 5

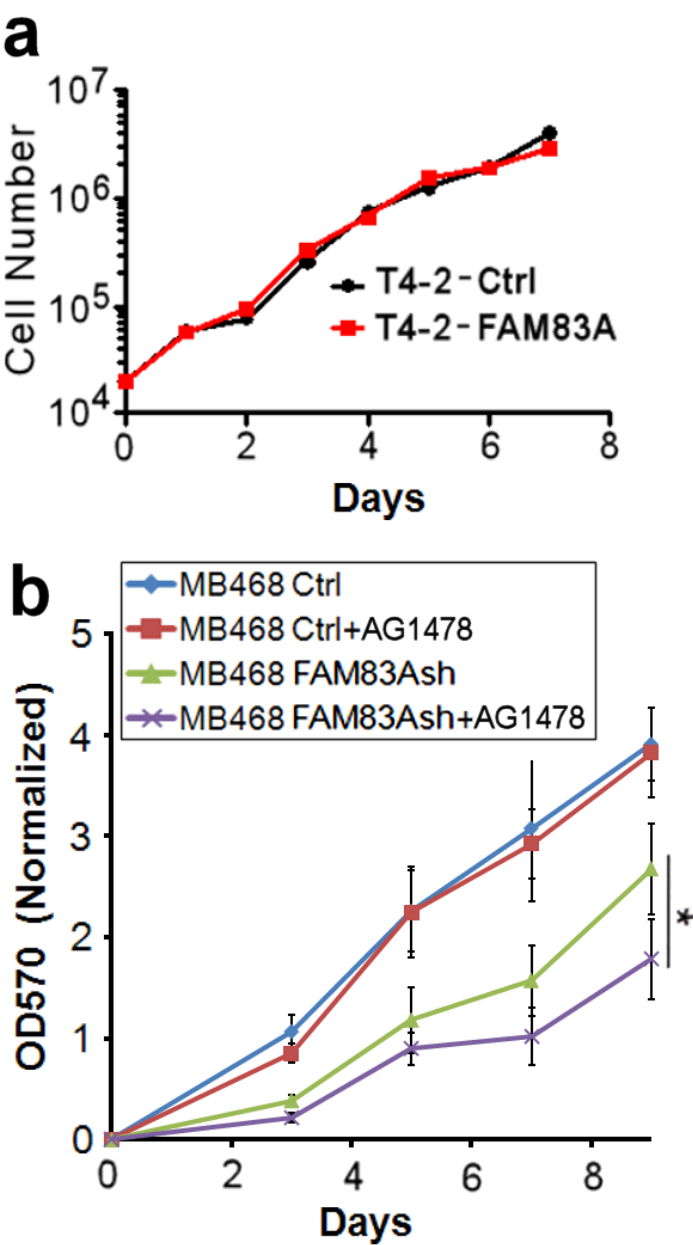

**Supplemental Figure 5. FAM83A expression does not accelerate cell growth, but confers resistance to EGFR-TKI.**

(a) T4-2 cells expressing vector (Ctrl) or FAM83A constructs were grown for 7 days in 2D monolayer cultures and cell numbers were monitored. (b) Growth of vector control vs. FAM83A-depleted MDA-MB468 cells treated with vehicle or AG1478 (300 nM) and measured by MTT assay for a period of 9 days (n=12; ANOVA two-tailed test: \*p<0.05).

Supplemental Figure 6

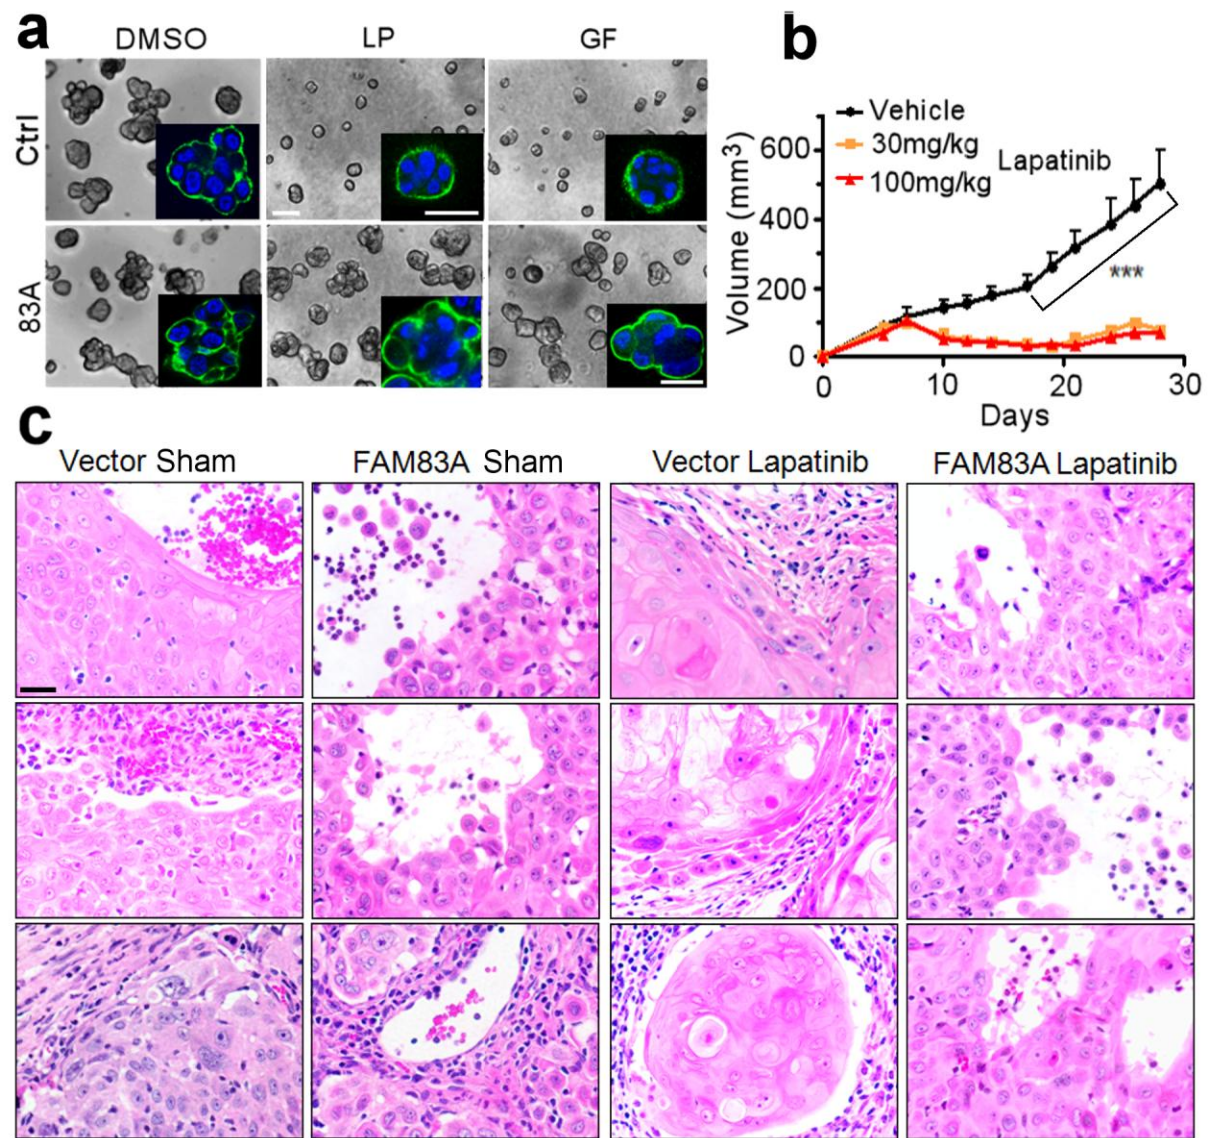

**Supplemental Figure 6. FAM83A overexpression confers resistance to tumor growth-suppressive activity of lapatinib in mice.**

(a) Vector control vs. FAM83A-overexpressing T4-2 cells were tested for their response to lapatinib (LP) or genitinib (GF) in 3D IrECM culture.  $\alpha 6$ -integrin staining (green) was used to indicate basal polarity (blue: DAPI; scale bars: 50 $\mu$ m). (b) Control T4-2 breast cancer cells were xenografted subcutaneously into nude mice. Mice were treated with vehicle or lapatinib (30 mg/kg or 100 mg/kg; n=8) using oral gavage for four weeks and tumor growth was monitored (2 way ANOVA analysis with Bonferroni post test:  $p < 0.001$ ). Note the dose-independent tumor growth-suppressive activity of lapatinib. (c) H&E stained sections of tumors excised from mice at the end of the experiment described in **Figure 3b**. Note the well-circumscribed and little or no invasiveness phenotype of control (vector) tumors treated with lapatinib in comparison to lapatinib-treated FAM83A-overexpressing tumors. (scale bar: 50  $\mu$ m)

Supplemental Figure 7

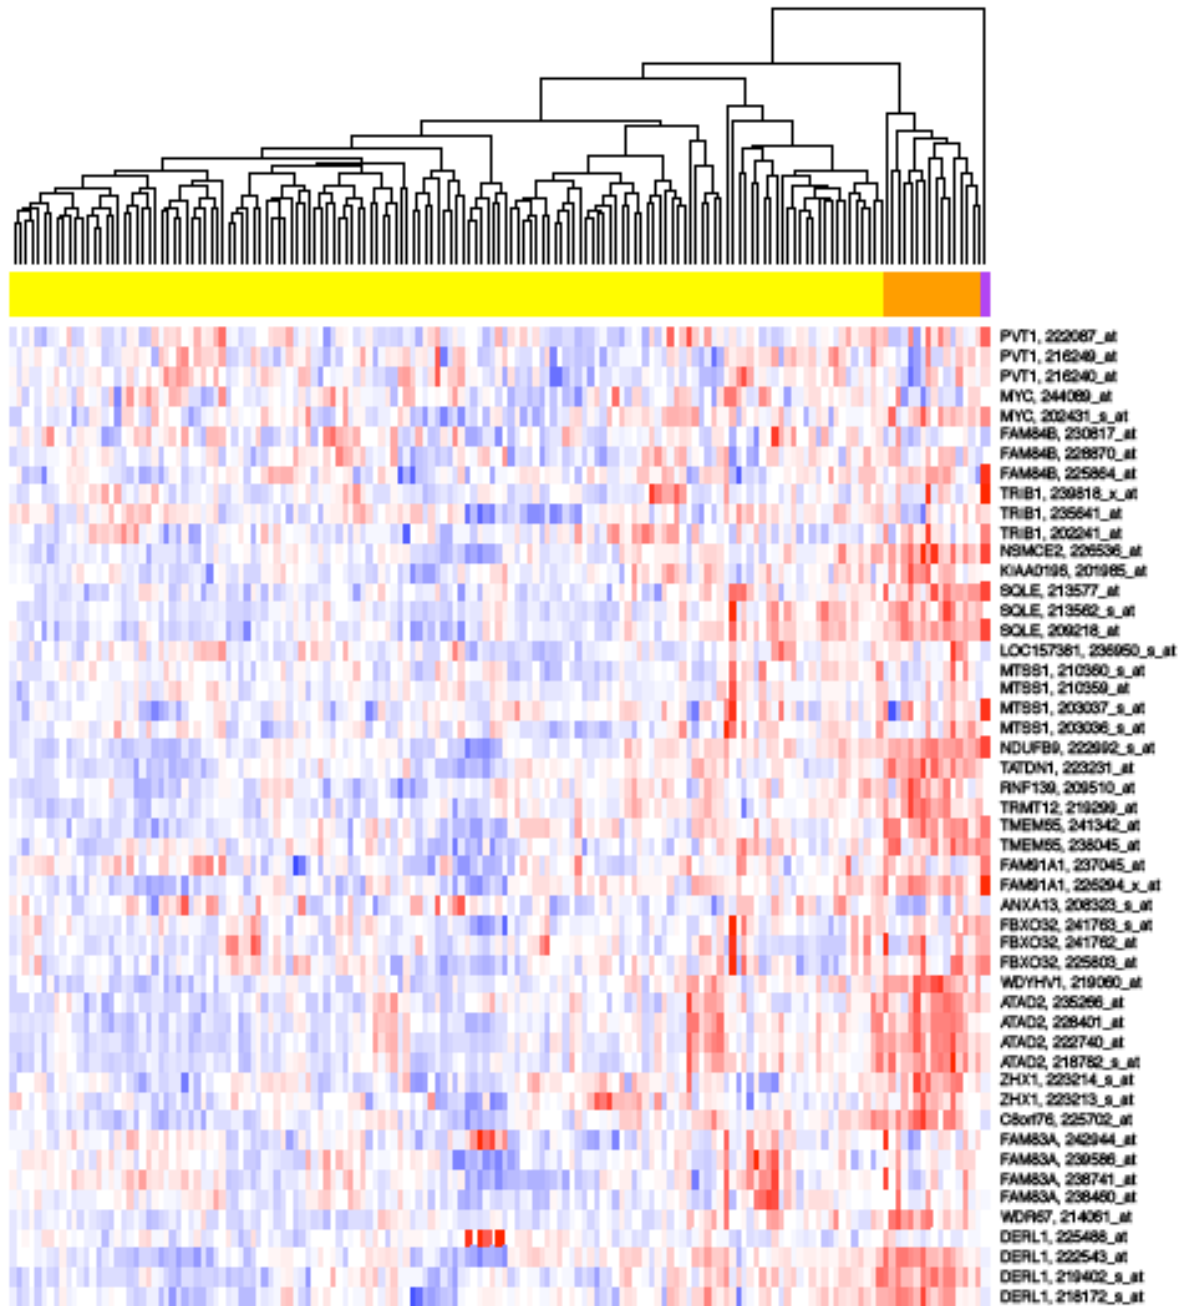

**Supplemental Figure 7. Hierarchical clustering of breast tumor samples by expression of genes located in the 8q24 amplicon.**

A set of 24 genes located in 8q24 amplicon were used to cluster 159 breast cancer samples based on the expression level (red=high, blue=low). Clustering identified two main classes of tumors displaying either high (orange) or low (yellow) expression for genes in the 8q24 amplicon with a single outlier sample (purple). Rows: relative expression level of probe; Columns: individual tumor samples. Genes are organized from top to bottom based on their chromosomal position.

Supplemental Figure 8

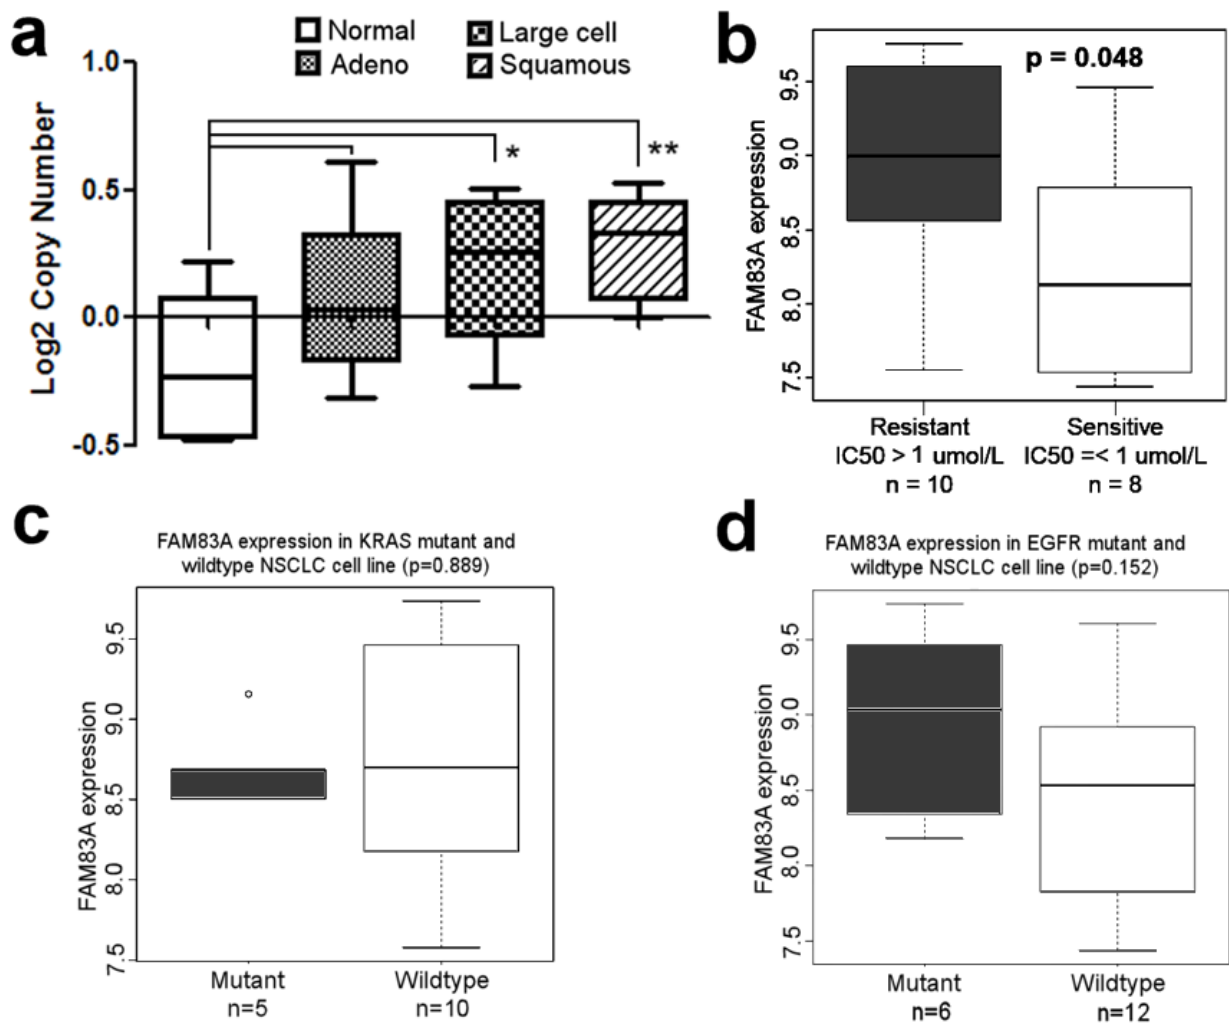

**Supplemental Figure 8. FAM83A gene is amplified in lung cancers and its overexpression correlates with resistance to EGFR-TKI.**

(a) FAM83A gene copy number in normal vs. cancerous lung tissues. The analysis was performed on the datasets obtained from Micke et al. (GSE28572)(4). Adeno: adenocarcinoma, Large cell: large cell carcinoma, and Squamous: squamous carcinoma. (n= 5. Student's t-test: \*p < 0.05, \*\*p < 0.01.

(b) FAM83A expression in non-small cell lung carcinoma cells that have become resistant vs. those sensitive to gefitinib treatment. The analysis was performed on the dataset obtained from Coldren et al. (GSE4342) (1). (Student's t-test: \*p < 0.05.) See **Supplemental Table 2** for cell lines used for the analysis.

(c) FAM83A expression in non-small cell lung carcinoma cells is irrelevant to KRAS mutation status. The analysis was performed as in (b). (Student's t-test: p > 0.05.)

(d) FAM83A expression in non-small cell lung carcinoma cells is irrelevant to EGFR mutation status. The analysis was performed as in (b). (Student's t-test: p > 0.05.)

Supplemental Figure 9

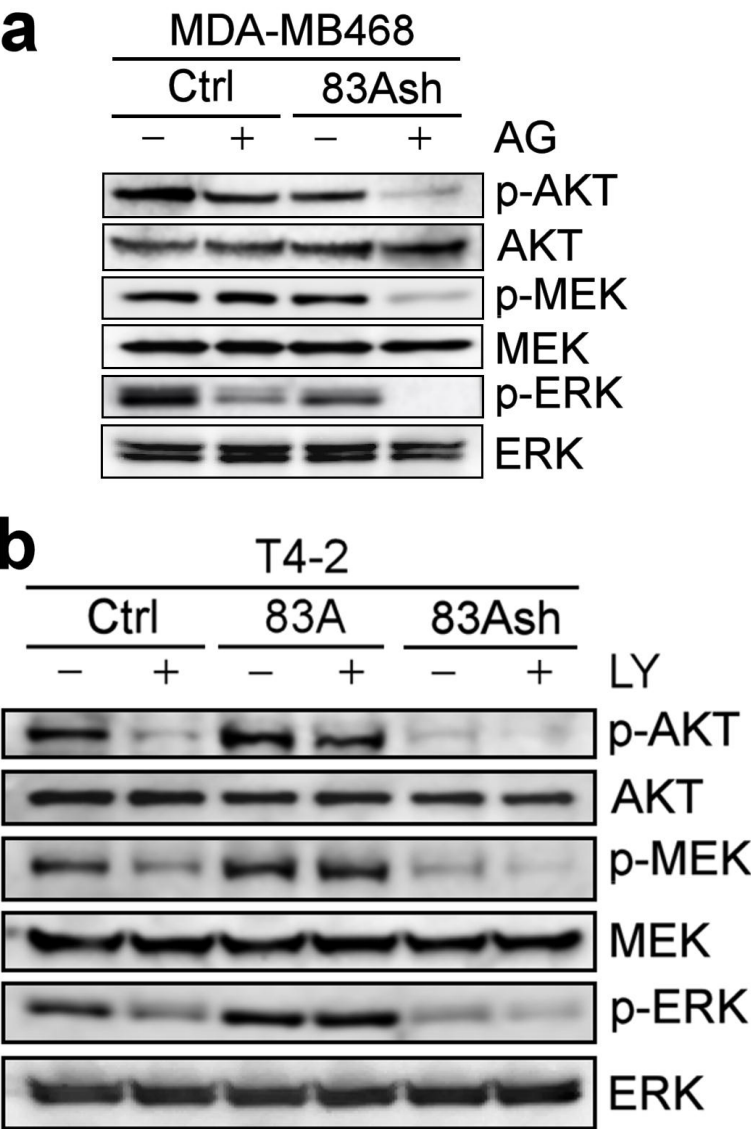

**Supplemental Figure 9. FAM83A level dictates the degree of resistance to EGFR-TKI AG1478 and PI3K inhibitor LY294002.**

(a) EGFR-TKI resistant breast cancer cell line, MDA-MB468, was treated with scramble (Ctrl) or FAM83Ash and cultured in the absence (-) or presence (+) of AG1478 for 2 hours. The levels of phosphorylated AKT, MEK1/2 and ERK1/2 were determined by western analysis.

(b) Control, FAM83A-overexpressing and FAM83Ash-expressing T4-2 cells were treated with LY294002 for 2 hours and the levels of phosphorylated AKT, MEK1/2 and ERK1/2 were determined by western analysis.

Supplemental Figure 10

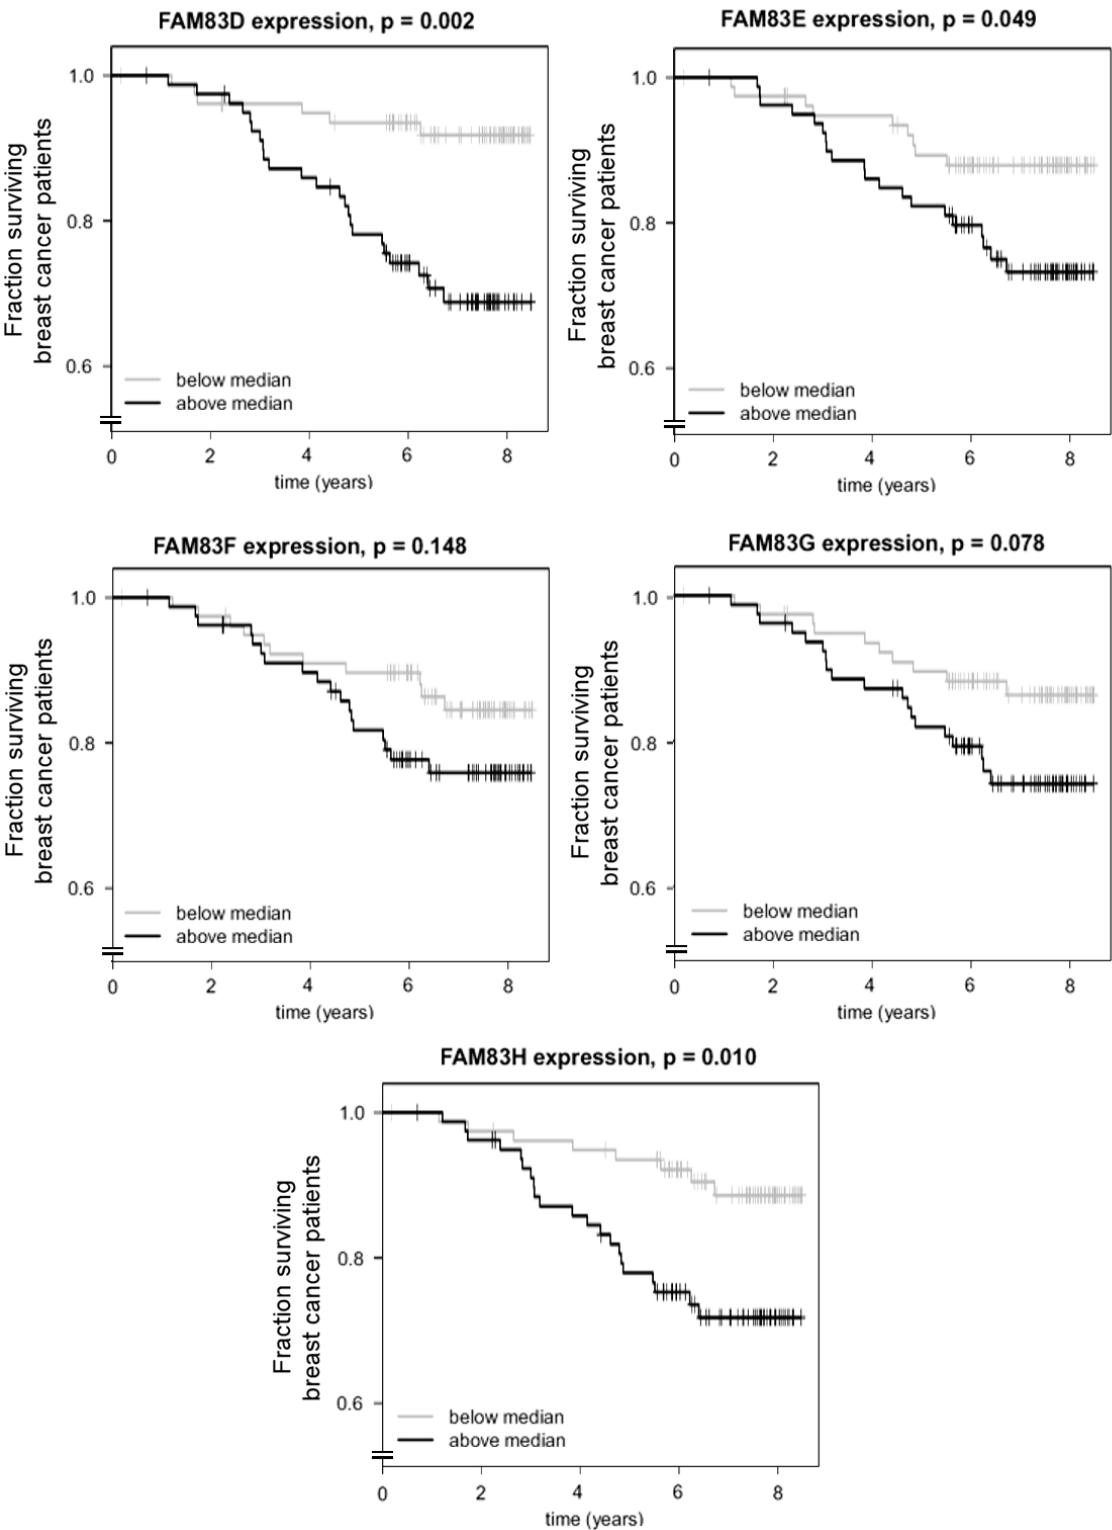

**Supplemental Figure 10. Correlation analysis for the expression of different FAM83 Family members (D,E, F, G and H) and breast cancer survival.**

The results are shown in Kaplan-Meier curves for a cohort of 159 patient samples (above median expression level vs. below medium expression level of a different FAM83 member).

**References**

1. Coldren, C.D., Helfrich, B.A., Witta, S.E., Sugita, M., Lapadat, R., Zeng, C., Barón, A., Franklin, W.A., Hirsch, F.R., Geraci, M.W., et al. 2006. Baseline gene expression predicts sensitivity to gefitinib in non-small cell lung cancer cell lines. *Mol. cancer Res.* 48.
2. Hawthorn, L., Luce, J., Stein, L., and Rothschild, J. 2010. Integration of transcript expression, copy number and LOH analysis of infiltrating ductal carcinoma of the breast. *BMC cancer* 10:460.
3. Beroukhi, R., Mermel, C.H., Porter, D., Wei, G., Raychaudhuri, S., Donovan, J., Barretina, J., Boehm, J.S., Dobson, J., Urashima, M., et al. 2010. The landscape of somatic copy-number alteration across human cancers. *Nature* 463.
4. Micke, P., Edlund, K., Holmberg, L., Kultima, H.G., Mansouri, L., Ekman, S., Bergqvist, M., Scheibenflug, L., Lamberg, K., Myrdal, G., et al. 2011. Gene copy number aberrations are associated with survival in histologic subgroups of non-small cell lung cancer. *J Thorac Oncol.* 6:1833-1840.
